# Supplementary material for: Alcohol consumers’ attention to warning labels and brand information on alcohol packaging: Findings from cross-sectional and experimental studies
Source: Springer Nature journal article supplement (doi:10.1186/s12889-017-4055-8), 2017-01-26
Supplement: MOESM3 [file 12021396]

These are general study tips...

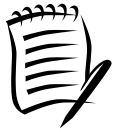

Take notes

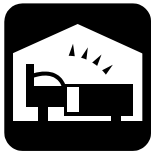

Sleep

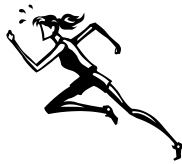

Exercise

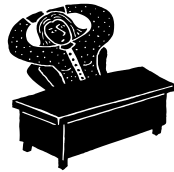

Take breaks

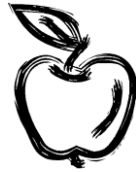

Eat healthy food

How many of these do you do?

...and each of these is a more specific adaptation.

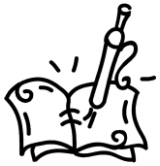

Pretend to take notes for someone else

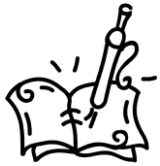

Test yourself

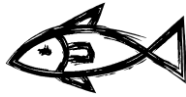

Eat oily fish

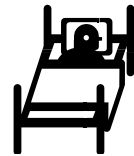

Sleep within 12 hours of studying

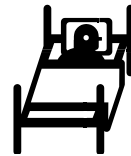

Study just before going to bed

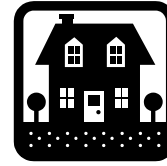

Study in different locations

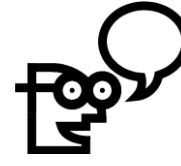

Read the information out loud

This table tells you what type of student you are.

| Learning style   | Characteristics                                                                                    | Specific tips                                                                                                                                                                                                                  |
|------------------|----------------------------------------------------------------------------------------------------|--------------------------------------------------------------------------------------------------------------------------------------------------------------------------------------------------------------------------------|
| TACTILE LEARNER  | Learns by touching and doing. Often speaks with their hands and may have difficulty sitting still. | <ul style="list-style-type: none"> <li>• Chew gum</li> <li>• Do hands-on activities whilst studying</li> <li>• Draw</li> </ul>                                                                                                 |
| AUDITORY LEARNER | Stores information by the way it sounds. Often hums or talks to themselves when bored.             | <ul style="list-style-type: none"> <li>• Record yourself</li> <li>• Songs/rhymes</li> <li>• Repeat</li> <li>• Acronyms</li> <li>• Read out loud</li> <li>• Study with others</li> </ul>                                        |
| VISUAL LEARNER   | Learns by reading or seeing pictures                                                               | <ul style="list-style-type: none"> <li>• Write down key words/ideas</li> <li>• Draw pictures</li> <li>• Avoid distractions while studying</li> <li>• Colour code things</li> <li>• Visualize things you see or hear</li> </ul> |

A **mnemonic** is a learning technique that translates information into a form that the brain can remember better than the original form.

You can make a mnemonic in many different ways. For example, creating a sentence with the same starting letters as the thing you want to remember (Please Excuse My Dear Aunt Sally).

It is recommended you get around 8 hours of **sleep** each night.

On top of that, losing **one night's sleep** can impair your reasoning and brain functioning for up to four days.

How do you feel?

You saw what type of learner you might be and received specific tips you can use to enhance your memory. **What do you think?**

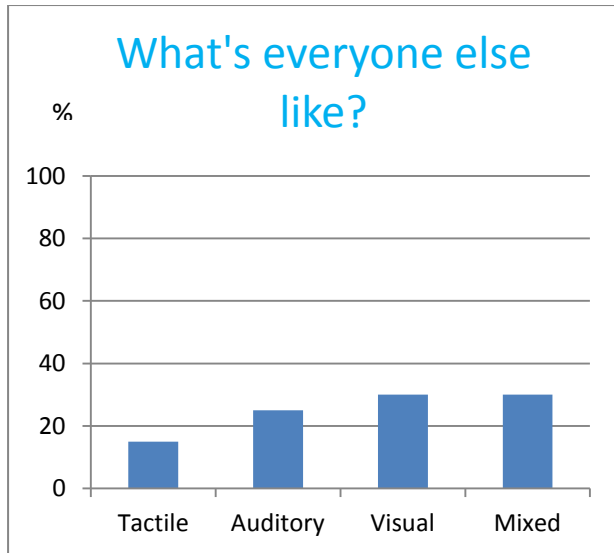

### The benefits of starting now

- Takes time to change habits
- Applicable to many aspects of life, not just university
- Trains your brain
- Learn new skills more easily

### Making your plan

- Plan study sessions at those times you're usually most active
- When bored, take a quick break or study a different subject
- Study in different locations
- Avoid studying when you're tired
- Set realistic goals
- Limit your caffeine intake
- Eat plenty of fruit and vegetables

### What targets should you aim for?

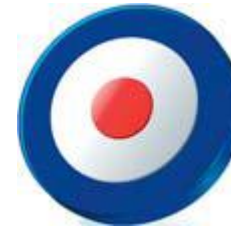

Study for 30 minutes every day

Sleep well

Find an interesting subject to learn to keep your brain active

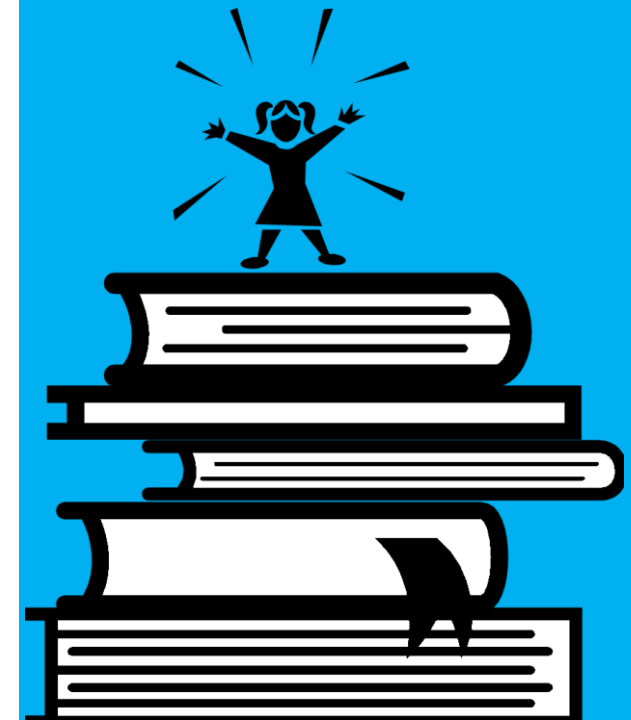

Brief advice about studying
